# Supplementary material
Source: PubMed Central journal article supplement (PMC2869021)
Supplement: mmc1.pdf [file mmc1.pdf]

AJHG, Volume 86

**Supplemental Data**

***Tuba8* Is Expressed at Low  
Levels in the Developing  
Mouse and Human Brain**

**Andreas Braun, Martin Breuss, Marion C. Salzer, Jonathan Flint, Nicholas J. Cowan, and David A. Keays**

S1

GAAGAGAGCGGCCACG  
atgaggggaatgcatatcggtccatgtgggtcaagccggagttcagattggcaatgcctgc  
M R E C I S V H V G Q A G V Q I G N A C  
tgggagctcttctgcttggagcacggcatccagggcgatggaaccttggcactcaggcc  
W E L F C L E H G I Q A D G T F G T Q A  
agcaagatcaacgatgacgactcctttaccacotttctcagtgagactggcaacgggaaa  
S K I N D D D S F T T F F S E T G N G K  
cacgtgccccgggtgtcatggtggacctggagcctaccgtagtagatgaggtgcgggca  
H V P R A V M V D L E P T V V D E V R A  
ggaacctaccgagctcttccatcctgagcagctgatcacaggcaaggaggatgcagct  
G T Y R Q L F H P E Q L I T G K E D A A  
aacaattacgcccggggcactatacgggtgggcaaggagatcgatctgggtgctggac  
N N Y A R G H Y T V G K E S I D L V L D  
cgaatccgtaaaactgactgatgctgctccggcttgagggttccctcatctccacagc  
R I R K L T D A C S G L Q G F L I F H S  
tttgggtggggcacaggatctggctttacttctctgctgatggagcgcctttccctagac  
F G G G T G S G F T S L L M E R L S L D  
tatggcaagaagccaagctggaatttgccatctaccagccccccaggtctccacagca  
Y G K K S K L E F A I Y P A P Q V S T A  
gtgggtggagccttacaactccatcctgaccaccataaccacctggaacattccgactgt  
V V E P Y N S I L T T H T T L E H S D C  
gctttcatgggtggataacgaagccatctacgacatctgccgcaggaacctggatattgaa  
A F M V D N E A I Y D I C R R N L D I E  
cgccccactataaccaactcaaccgctcatcagccagattgtgtcctccatcactgcc  
R P T Y T N L N R L I S Q I V S S I T A  
tctctccgctttgatggcgccctcaatgtggacctcacagagtttcagaccaacctggta  
S L R F D G A L N V D L T E F Q T N L V  
cctaccccccgaatccacttcccgctggtcacttacgcccccatcttctgctgagaaa  
P Y P R I H F P L V T Y A P I I S A E K  
gctbaccacgagcagctgtctgtggcagagataaactagctcctgtttcgagcccaacagc  
A Y H E Q L S V A E I T S S C F E P N S  
cagatggtgaagtgtgacccacgtcatggcaatacatggcctgctgcatgctctacccg  
Q M V K C D P R H G K Y M A C C M L Y R  
ggtgatgctggtacaggaagcgtgaatgtcggcattgctgccatcaagaccaagaaaact  
G D V V P K D V N V A I A A I K T K R T  
attcaqtttqtgactggttcccacaqgtttcaagctgagatgagatgagccact  
I Q F V D W C P T G F K V G I N Y Q P P  
actgtctgcccagagggggacctggcctgctgcccagcagcctgctgcatgctgagcaac  
T V V P G G D L A K V Q R A V C M L S N  
accacagcaatcgacagagcctgggcccgccttgaccataagtttgacctcatgtacgcc  
T T A I A E A W A R L D H K F D L M Y A  
aaqggggcctttgtacatggtatggttggagagggatggaagaagggaggttttctgag  
K R A F V H W Y V G E G M E E G E F S E  
gcccagggagcctgctgctgaggaagggatgatgaagaagggagcatttctgatt  
A R E D L A A L E K D Y E E V G T D S F  
gaagaagagaatgagggggaggaattttaa  
E E E N E G E E F \*  
ATATACACTTGCCCATGACTATGCCTCTTCTTTGTGTGGTTCACACTCACAGCATGCT  
GGGTTCCTAGTGTGCGTTCAGACACCCAGCTGCAGATGCACATGGTCTCTCCTGTTTTC  
TCCTCTTAGGATGCTGGGCTCACTCTTCTGTGGGAAAAGGAAACCACAGAAAAGAGAAAG  
TGACAGGCAGGCCTCTCAGTCC CAGCCTACTTCTGTCTACATAGACGGGCCCTGACT  
CCAGCACCCAGGCATTTGTGACAGACACAAGGACACTGAACATACAGGGAACCTCCCTCTG  
GAATAGAAATATTTCACTTACTGAAGGATGAAAGTGAACAGGTACGAACATGGGGTTAAGA  
AACTTAATCTAGTTTACTGAGTTGCCCTAAGACAGAGCCTGCTGTTGGAAGAATAGG  
ACCACA CCAGCAAAAACCCAGTCTGGGAAGATGCTGCAGAGAGATGGGATGGACAGACGC  
TTGTGTGATGGATCCACAGCACAGCCCTGACCTCGTCTGGATCGATCACATTCGTTTCATC  
AAGAGTTTGTAGTATCTCTATCCCTTTCCCTCTCGGGTGTGTTCCAAGACCCTCACTAGAT  
GACGACCAAGAGCTCTGTCCCTGTACCTATGTCTGTCTGTCTGTCTGTCTGTGTTT  
TCTATACTTACACACATTATGAAGTATAATTTAGACACCAGCACAGTGAGACATTAGCAA

**Figure S1:** *Tuba8* cDNA sequence (GU591980), encoding a 449 amino acid protein. Blue and black lettering show alternating exons. Red shaded nucleotides show the intron spanning primers used for qPCR. Nucleotides in italics show primers employed to amplify and then clone *Tuba8* cDNA. Grey shading and yellow lettering, respectively, show the long and short probes used in this study. The probe employed by Sheridan and colleagues is underlined.

## S2

**Figure S2:** *In situ* hybridization results for the adult cerebellum and olfactory bulb using the short (A,C) and long probes (B,D) targeting the 3' UTR of *Tuba8*. Staining is observed in the mitral cell layer (MCL) and the granule cell layer (GCL) of the olfactory bulbs, as well as the Purkinje cell layer (PCL) in the cerebellum (C,D). We observed no staining when employing control sense probes (data not shown). All panels show coronal sections (40 $\mu$ m) and the scale bar indicates 100 $\mu$ m.

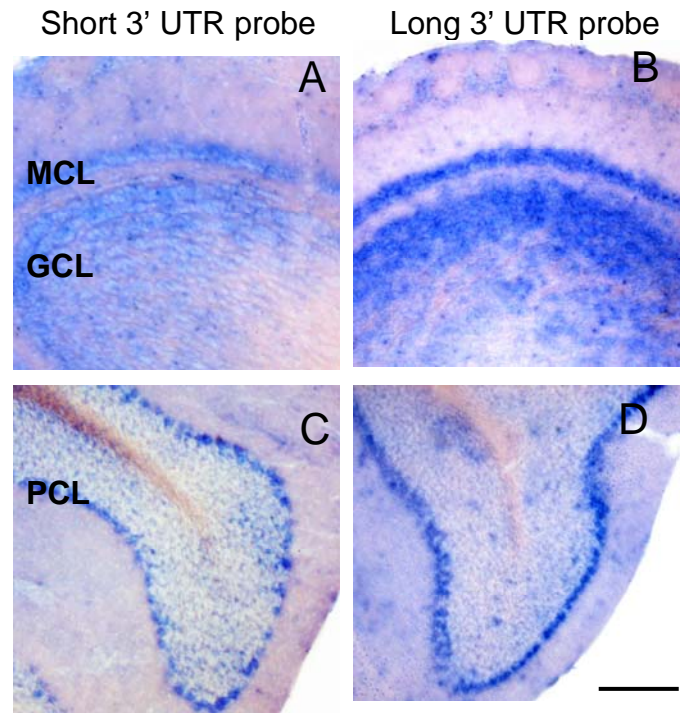

## S3

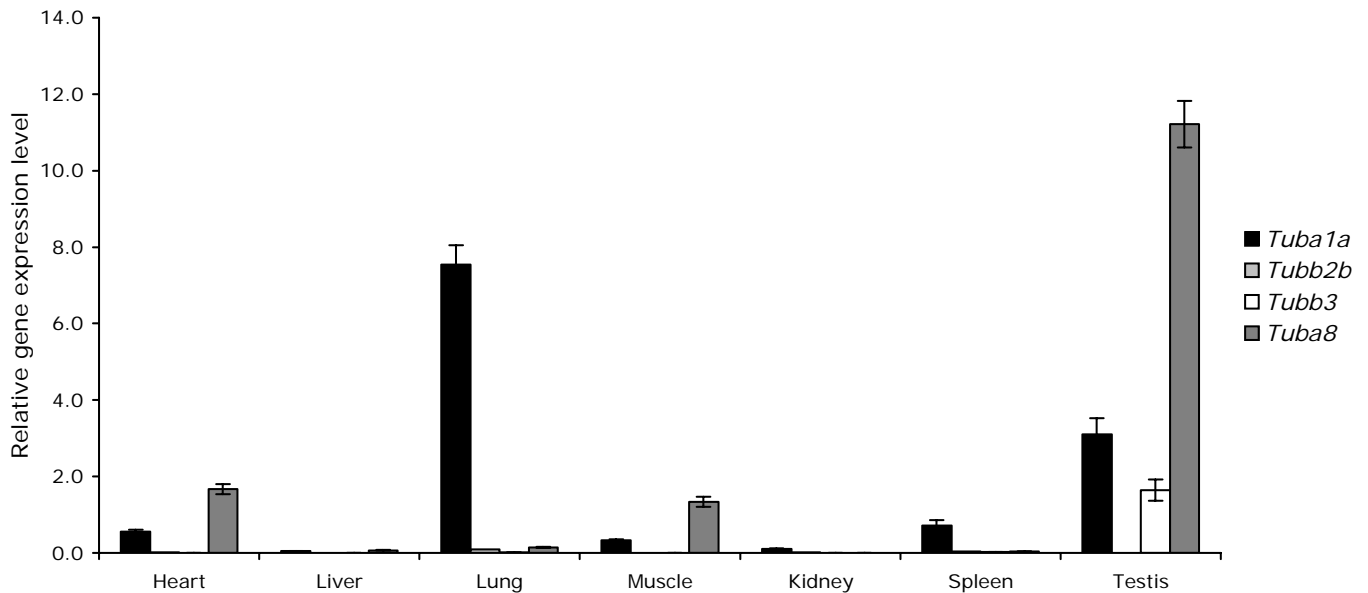

**Figure S3:** Real time qPCR on the heart, liver, lung, skeletal muscle, kidney, spleen and testis of the adult mouse. *Tuba8* is expressed at highest levels in the testis, followed by heart and skeletal muscle. The notable expression of *Tuba1a* in the lung and testis is consistent with the results reported by Villasante et al, 1986.

Table S1 – Primers

| Species | Gene          | Experiment                 | Primer  | Sequence                    |
|---------|---------------|----------------------------|---------|-----------------------------|
| Mouse   | <i>Tuba8</i>  | <i>cDNA cloning</i>        | Forward | GAAGAGAGCGGCCACGAT          |
|         |               |                            | Reverse | TTGCTAATGTCTCACTGTGCTG      |
| Mouse   | <i>Tuba8</i>  | <i>In situ</i> – UTR long  | Forward | ATATACTTGTCCCATGAC          |
|         |               |                            | Reverse | CTCTTGATGAACGAATGTGA        |
| Mouse   | <i>Tuba8</i>  | <i>In situ</i> – UTR short | Forward | CAGCCTACTTCTGTCTAC          |
|         |               |                            | Reverse | TGTGGTCCTATTCTTCCAAC        |
| Mouse   | <i>Tuba8</i>  | <i>In situ</i> – Sheridan  | Forward | ATGGCAAATACATGGCCTGC        |
|         |               |                            | Reverse | CATGGGGCAAGTGTATATTTAAAATTC |
| Mouse   | <i>Tuba1a</i> | qPCR                       | Forward | TCTCTTACATCGACCGCTAA        |
|         |               |                            | Reverse | GCCAACATGGATGGAGATG         |
| Mouse   | <i>Tuba8</i>  | qPCR                       | Forward | TTCTGCTGAGAAAGCCTACCA       |
|         |               |                            | Reverse | CTGGTAGTTGATGCCACCT         |
| Mouse   | <i>Tubb2b</i> | qPCR                       | Forward | TCATCAGACCCACTGACACAG       |
|         |               |                            | Reverse | TTTCCAGTTGCAAATCACTGTC      |
| Mouse   | <i>Tubb3</i>  | qPCR                       | Forward | ATTCTGGTGGACTTGGAACCT       |
|         |               |                            | Reverse | ACTCTTTCCGCACGACATCT        |
| Human   | <i>TUBA1A</i> | qPCR                       | Forward | TCTCTTACATCGACCGCTAA        |
|         |               |                            | Reverse | CATTGCCAATCTGGACACC         |
| Human   | <i>TUBA8</i>  | qPCR                       | Forward | GATGCAGCCAACAACACTATGC      |
|         |               |                            | Reverse | CAGAGCAAGCATCTGTCAGC        |
| Human   | <i>TUBB2B</i> | qPCR                       | Forward | AGGCACCATGCGTGAGAT          |
|         |               |                            | Reverse | TCCAGCTGCAAATCACTGTC        |
| Human   | <i>TUBB3</i>  | qPCR                       | Forward | GGAGATCGTGACATCCAG          |
|         |               |                            | Reverse | TCGAGGCACGTACTTGTGAG        |
| Mouse   | <i>Tuba8</i>  | qPCR - Replication         | Forward | AGCAAGATCAACGATGACGAC       |
|         |               |                            | Reverse | CCACCAAAGCTGTGGAAGAT        |
| Human   | <i>TUBA8</i>  | qPCR - Replication         | Forward | GTCCACAGGCTTCAAGGT          |
|         |               |                            | Reverse | TTGCTGAGCATGCAGACG          |
